# Supplementary material for: Hydrophobic Janus Foam Motors: Self-Propulsion and On-The-Fly Oil Absorption
Source: MDPI journal article supplement (doi:10.3390/mi9010023), 2018-01-11
Supplement: s1 [file s1]

# Hydrophobic Janus Foam Motors: Self-Propulsion and On-The-Fly Oil Absorption

Xiaofeng Li, Fangzhi Mou \*, Jingjing Guo, Zhuoyi Deng, Chuanrui Chen, Leilei Xu, Ming Luo and Jianguo Guan \*

State Key Laboratory of Advanced Technology for Materials Synthesis and Processing, International School of Materials Science and Engineering, Wuhan University of Technology, Wuhan 430070, China; xiaofegli@whut.edu.cn (X.L.); october@whut.edu.cn (J.Guo); zydeng2017@whut.edu.cn (Z.D.); chc034@ucsd.edu (C.C.); xull@whut.edu.cn (L.X.); luoming\_2016@whut.edu.cn (M.L.)

\* Correspondence: moufz@whut.edu.cn (F.M.); guanjq@whut.edu.cn (J.Guan)

## Supporting Figures

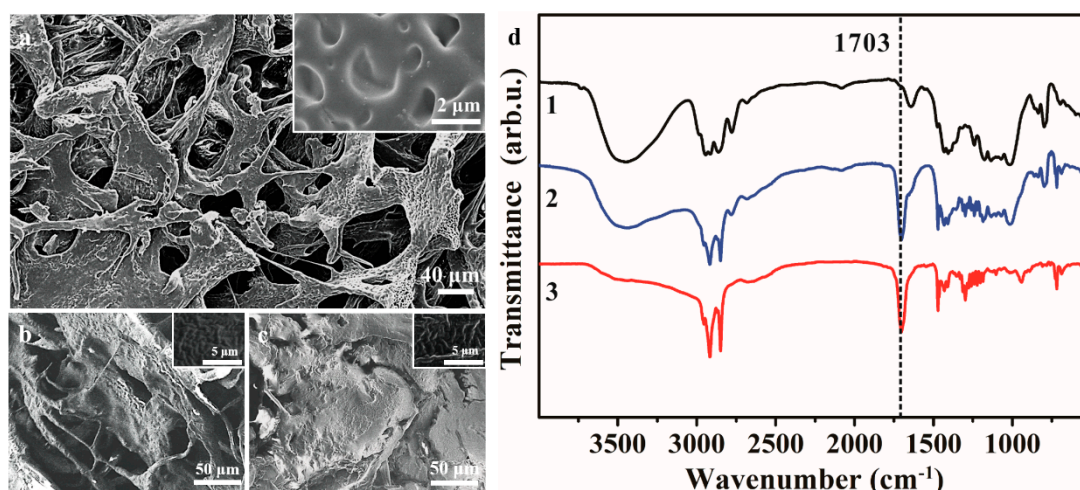

**Figure S1.** (a–c) SEM images and (d) FTIR spectra of the (a) pristine PVA foam, (b) PVA foam modified with SA, and (c) the Janus foam motor loaded with camphor, respectively.

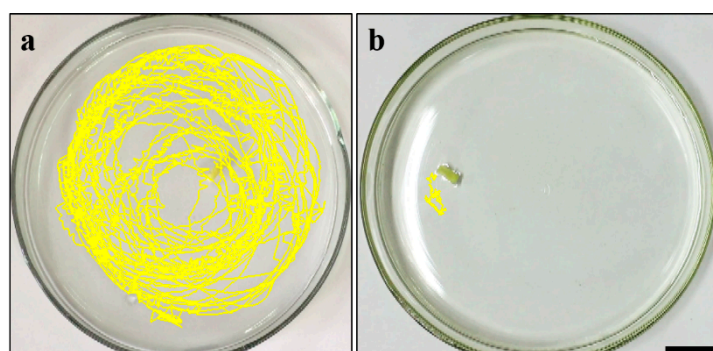

**Figure S2.** Trajectories of (a) a typical Janus foam motor and (b) a SA-PVA foam in 10 min. Scale bar: 20 mm.

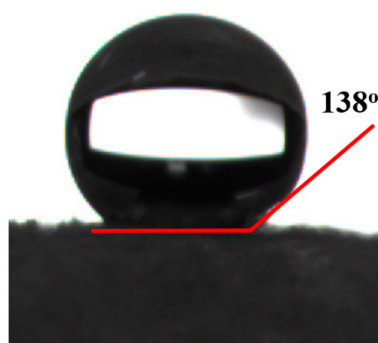

**Figure S3.** The contact angle of water on the surface of the SA end of the Janus foam motor.

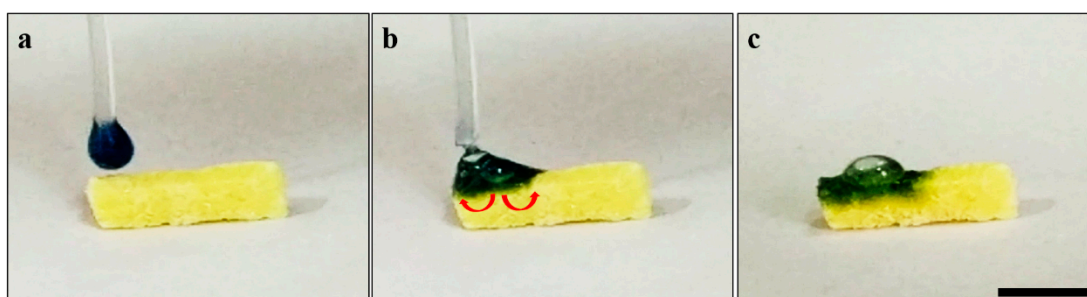

**Figure S4.** The oil/water separation by the Janus foam motor. When a mixed oil (colored with blue dye) and water drop (a) is dropped on the SA end of the motor, the oil is immediately absorbed (b), leaving a water droplet on the motor surface (c). Scale bar: 5 mm.

## Supporting Videos

**Supporting video 1:** Self-propulsion of a Janus foam motor on water.

**Supporting video 2:** On-the-fly Oil capture and absorption by a Janus foam motor.

**Supporting video 3:** Oil capture and absorption by a Janus foam motor and an immobile SA-PVA foam.

**Supporting video 4:** Self-assembly of Janus foam motors.

**Supporting video 5:** Self-assembly process of two SA-PVA foams before and after oil absorption.
